# Supplementary material for: Sedimentary ancient DNA insights into foraminiferal diversity near the grounding line in the western Ross Sea, Antarctica
Source: Copernicus journal article supplement (doi:10.5194/egusphere-2024-2824), 2024-10-07
Supplement: Supplementary file 1 [file egusphere-2024-2824-supplement.pdf]

**Supplementary materials**

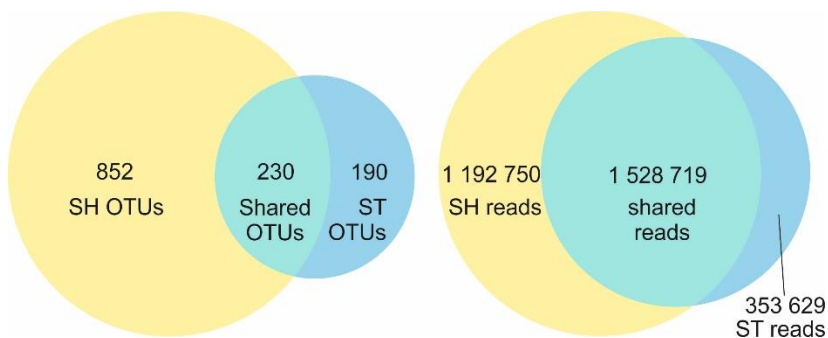

Supplementary Fig. S1. Venn diagram of shared and non-shared OTUs based on the ST and SH pairs of primers. Comparison of the OTUs composition among two datasets based on the same region (37F).

Supplementary Table S1. Source data based on OTUs with  $\geq 10$  reads in a single sample.

*This is a large Excel file which cannot be provided as a pdf. Prior to publication, this dataset will be stored and made available on a public data repository.*

Supplementary Table S2. Average OTUs and reads percentages (%) for different taxonomic groups and sediment types, shown for standard (ST) and short (SH) primer pairs, n – number of samples. Counted on OTUs with  $\geq 10$  reads in a single sample.

| Sediment type          | n  | Planktonics |       | Rotaliida |       | Textulariida |       | Tubothalamea |       | Monothalamea |       | Unassigned |       |
|------------------------|----|-------------|-------|-----------|-------|--------------|-------|--------------|-------|--------------|-------|------------|-------|
|                        |    | OTUs        | Reads | OTUs      | Reads | OTUs         | Reads | OTUs         | Reads | OTUs         | Reads | OTUs       | Reads |
| <b>ST</b>              |    |             |       |           |       |              |       |              |       |              |       |            |       |
| All positive           | 17 | 4,56        | 3,61  | 9,70      | 5,27  | 1,79         | 2,25  | 4,25         | 1,85  | 58,55        | 67,24 | 21,16      | 19,78 |
| Surface open-marine    | 5  | 1,87        | 0,75  | 5,54      | 1,34  | 3,03         | 7,24  | 1,93         | 0,70  | 53,93        | 72,29 | 33,69      | 17,69 |
| Subsurface open-marine | 6  | 3,02        | 1,82  | 8,97      | 2,54  | 2,55         | 0,35  | 4,87         | 2,51  | 62,61        | 72,51 | 17,98      | 20,27 |
| Glacier proximal       | 6  | 8,33        | 7,77  | 13,89     | 11,27 | 0,00         | 0,00  | 5,56         | 2,15  | 58,33        | 57,77 | 13,89      | 21,04 |
| Subglacial till        | 9  | 0           | 0     | 0         | 0     | 0            | 0     | 0            | 0     | 0            | 0     | 0          | 0     |
| <b>SH</b>              |    |             |       |           |       |              |       |              |       |              |       |            |       |
| All positive           | 20 | 12,92       | 13,35 | 2,21      | 1,24  | 2,65         | 1,93  | 12,14        | 8,60  | 58,35        | 69,25 | 11,73      | 5,63  |
| Surface open-marine    | 5  | 2,21        | 2,56  | 5,31      | 2,71  | 5,12         | 5,10  | 6,71         | 10,14 | 68,32        | 71,97 | 12,35      | 7,52  |
| Subsurface open-marine | 6  | 6,97        | 17,90 | 2,55      | 1,87  | 3,27         | 2,04  | 7,53         | 6,23  | 66,82        | 63,23 | 12,85      | 8,74  |
| Glacier proximal       | 9  | 22,85       | 16,32 | 0,26      | 0,00  | 0,85         | 0,11  | 18,24        | 9,32  | 47,17        | 71,75 | 10,64      | 2,51  |
| Subglacial till        | 9  | 0           | 0     | 0         | 0     | 0            | 0     | 0            | 0     | 0            | 0     | 0          | 0     |

Supplementary Table S3. List of foraminiferal taxa identified in different environmental settings by the ST and SH molecular barcodes, and by micropaleontological analysis according to Majewski et al. (2020). Bolded pluses in ST and SH columns indicate species assigned to database with  $\leq 99\%$  of similarity. OTUs with less than 10 reads in a single sample are removed.

\* Doubtfull taxonomic interpretation. Taxa not present in the Ross Sea.

| Class               | Order                   | Genus                        | Species                      | Surface open-marine                      |    | Subsurface open-marine |    | Glacier proximal |    |   |   |
|---------------------|-------------------------|------------------------------|------------------------------|------------------------------------------|----|------------------------|----|------------------|----|---|---|
|                     |                         |                              |                              | ST                                       | SH | ST                     | SH | ST               | SH |   |   |
|                     |                         |                              |                              | microfossils                             |    | microfossils           |    | microfossils     |    |   |   |
| Globothalamacea     | caul-arcous<br>benthic  | Robertinida                  | <i>Pseudobulimina</i>        | <i>P. chapmani</i>                       | +  | -                      | -  | -                | -  | - |   |
|                     |                         |                              | <i>Astrononion</i>           | <i>A. antarcticum</i>                    | -  | +                      | -  | -                | -  | - | + |
|                     |                         |                              |                              | <i>A. echolsi</i>                        | -  | +                      | -  | -                | -  | - | - |
|                     |                         |                              | <i>Bolivina</i>              | <i>B. bolivina</i> sp.                   | +  | -                      | -  | -                | -  | - | - |
|                     |                         |                              |                              | <i>B. subaenariensis</i>                 | +  | +                      | -  | -                | -  | - | - |
|                     |                         |                              |                              | <i>B. variabilis</i>                     | +  | +                      | -  | -                | -  | - | - |
|                     |                         |                              | <i>Bolivinellina</i>         | <i>B. pseudopunctata</i>                 | -  | -                      | +  | +                | -  | - | + |
|                     |                         |                              | <i>Cassidulina</i>           | <i>Cassidulina</i> cf. <i>neoteretis</i> | -  | -                      | -  | -                | -  | - | + |
|                     |                         |                              | <i>Cassidulinoidea</i>       | <i>Cassidulinoidea</i> sp.               | -  | -                      | -  | -                | -  | - | + |
|                     |                         |                              |                              | <i>C. parkerianus</i>                    | -  | -                      | -  | -                | -  | - | + |
|                     |                         |                              | <i>Ehrenbergina</i>          | <i>E. glabra</i>                         | -  | -                      | -  | -                | -  | - | + |
|                     |                         |                              | <i>Glabrata</i>              | <i>Glabrata</i> sp.*                     | +  | -                      | -  | -                | -  | - | - |
|                     |                         |                              | <i>Globocassidulina</i>      | <i>G. bora</i>                           | -  | +                      | -  | -                | -  | - | + |
|                     |                         |                              |                              | <i>G. subglobosa</i>                     | +  | +                      | +  | +                | +  | + | + |
|                     |                         |                              | <i>Cibicides</i>             | <i>Cibicides</i> sp.                     | +  | +                      | -  | -                | +  | - | + |
|                     |                         |                              |                              | <i>C. antarcticus</i>                    | +  | +                      | -  | -                | -  | - | + |
|                     |                         |                              | <i>Cibicides</i>             | <i>C. wuellerstorfi</i>                  | +  | +                      | +  | -                | +  | - | + |
|                     |                         |                              | <i>Elphidium</i>             | <i>Elphidium</i> sp.                     | +  | +                      | -  | -                | -  | - | + |
|                     |                         |                              |                              | <i>E. excavatum</i>                      | +  | +                      | -  | -                | -  | - | + |
|                     |                         |                              |                              | <i>E. vellai</i>                         | +  | +                      | -  | -                | -  | - | + |
|                     |                         |                              | <i>Epistominella</i>         | <i>Epistominella</i> sp.                 | +  | +                      | +  | -                | -  | - | + |
|                     |                         |                              |                              | <i>E. vitrea</i>                         | +  | +                      | +  | -                | -  | - | + |
|                     |                         |                              | <i>Fursenkoina</i>           | <i>F. fusiformis</i>                     | -  | -                      | -  | -                | -  | - | + |
|                     |                         |                              | <i>Ioanella</i>              | <i>I. tumidula</i>                       | -  | -                      | -  | -                | -  | - | + |
|                     |                         |                              | <i>Murrayinella</i>          | <i>M. globosa</i> *                      | +  | +                      | -  | -                | -  | - | + |
|                     |                         |                              | <i>Nonionella</i>            | <i>N. auris</i>                          | +  | +                      | +  | +                | +  | + | + |
|                     |                         |                              |                              | <i>N. bradyi</i>                         | -  | +                      | -  | +                | +  | + | + |
|                     |                         |                              |                              | <i>N. iridea</i>                         | -  | +                      | -  | +                | +  | + | + |
|                     |                         |                              | <i>Planoperulina</i>         | <i>P. heterosteginoidea</i> *            | -  | +                      | -  | -                | -  | - | + |
|                     |                         |                              | <i>Nuttallides</i>           | <i>Nuttallides</i> sp.                   | -  | +                      | -  | -                | -  | - | + |
|                     |                         |                              | <i>Pullenia</i>              | <i>P. subcarinata</i>                    | -  | -                      | -  | -                | -  | - | + |
|                     |                         |                              | <i>Rosalina</i>              | <i>R. globularis</i>                     | -  | -                      | -  | -                | -  | - | + |
|                     |                         |                              | <i>Stainforthia</i>          | <i>Stainforthia</i> sp.                  | +  | +                      | +  | -                | -  | - | + |
|                     |                         |                              |                              | <i>S. concava</i>                        | -  | -                      | -  | -                | -  | - | + |
|                     |                         |                              | <i>Trifarina</i>             | <i>T. earlandi</i>                       | -  | -                      | -  | +                | -  | - | + |
|                     |                         | <i>Globigerina</i>           | <i>G. glutinata</i>          | +                                        | -  | -                      | -  | -                | -  | - |   |
|                     |                         | <i>Globorotalia</i>          | <i>G. scitula</i>            | -                                        | +  | -                      | -  | -                | -  | - |   |
|                     |                         | <i>Neoglobobulimina</i>      | <i>N. pachyderma</i>         | +                                        | +  | +                      | +  | +                | +  | + |   |
|                     |                         | agglutinated                 | <i>Arenoparrella</i>         | <i>A. mexicana</i>                       | -  | -                      | -  | +                | -  | - |   |
|                     |                         |                              | <i>Labrospira</i>            | <i>L. wiesneri</i>                       | -  | -                      | +  | -                | -  | - |   |
|                     |                         |                              | <i>Paratrochammina</i>       | <i>P. bartrami</i>                       | -  | -                      | +  | -                | -  | - |   |
|                     |                         |                              | <i>Portatrochammina</i>      | <i>Portatrochammina</i> sp.              | -  | -                      | +  | -                | -  | - |   |
|                     |                         |                              | <i>Recurvirostra</i>         | <i>R. contorta</i>                       | -  | -                      | +  | -                | -  | - |   |
|                     |                         |                              | <i>Spiroplectammina</i>      | <i>S. bifurcata</i>                      | -  | -                      | +  | -                | -  | - |   |
|                     |                         |                              | <i>Cribratostomoides</i>     | <i>Cribratostomoides</i> sp.             | +  | +                      | -  | -                | -  | - |   |
|                     | <i>Caterina</i>         |                              | <i>C. spiculotesta</i> *     | +                                        | +  | -                      | +  | -                | -  |   |   |
|                     | <i>Eggerella</i>        |                              | <i>Eggerella</i> sp.         | +                                        | +  | -                      | -  | -                | -  |   |   |
|                     | <i>Reophax</i>          |                              | <i>Reophax</i> sp.           | +                                        | +  | +                      | -  | -                | -  |   |   |
|                     |                         | <i>R. piluliferarenulata</i> | +                            | +                                        | +  | -                      | -  | -                |    |   |   |
|                     |                         | <i>R. spiculifer</i>         | +                            | +                                        | +  | -                      | -  | -                |    |   |   |
|                     |                         | <i>R. subfusiformis</i>      | +                            | +                                        | +  | -                      | -  | -                |    |   |   |
|                     | <i>Textularia</i>       | <i>Textularia</i> sp.        | -                            | -                                        | +  | -                      | -  | -                | +  |   |   |
|                     |                         | <i>T. agglutinans</i>        | -                            | -                                        | +  | -                      | -  | -                | +  |   |   |
|                     |                         | <i>T. antarctica</i>         | -                            | -                                        | +  | -                      | -  | -                | +  |   |   |
|                     |                         | <i>T. sagittula</i>          | -                            | -                                        | +  | -                      | -  | -                | +  |   |   |
| Nodosariata         |                         | <i>Hormosinella</i>          | <i>Hormosinella</i> sp.      | -                                        | -  | +                      | -  | +                | -  |   |   |
| Tubothalamacea      | Miliolida               | <i>Borelis</i>               | <i>Borelis</i> sp.*          | -                                        | +  | -                      | -  | -                | -  |   |   |
|                     |                         | <i>Cornuspira</i>            | <i>C. antarctica</i>         | -                                        | -  | -                      | +  | -                | -  |   |   |
|                     |                         | <i>Cornuspira</i>            | <i>Cornuspira</i> sp.        | -                                        | -  | -                      | -  | +                | -  |   |   |
|                     |                         | <i>Cyclogyra</i>             | <i>Cyclogyra</i> sp.         | +                                        | -  | +                      | -  | -                | -  |   |   |
|                     |                         | <i>Siphonaperta</i>          | <i>Siphonaperta</i> sp.      | +                                        | -  | -                      | -  | -                | -  |   |   |
|                     |                         | <i>Miliammina</i>            | <i>Miliammina</i> sp.        | +                                        | +  | -                      | +  | -                | -  |   |   |
|                     |                         | <i>M. arenacea</i>           | <i>M. arenacea</i>           | +                                        | +  | -                      | -  | -                | +  |   |   |
|                     |                         | <i>Cornuspirammina</i>       | <i>Cornuspirammina</i> sp.   | +                                        | +  | +                      | +  | +                | +  |   |   |
|                     |                         | <i>Spirophthalmidium</i>     | <i>Spirophthalmidium</i> sp. | +                                        | +  | +                      | -  | -                | -  |   |   |
|                     |                         | <i>Spiroloculina</i>         | <i>Spiroloculina</i> sp.     | -                                        | -  | -                      | -  | -                | -  |   |   |
| Monothalamacea      | Allogromiida            | <i>Haplomyxa</i>             | <i>Haplomyxa</i> sp.*        | -                                        | +  | -                      | -  | -                | -  |   |   |
|                     |                         | <i>Reticulomyxa</i>          | <i>R. hanna</i> *            | +                                        | -  | -                      | -  | -                | -  |   |   |
|                     |                         | <i>Allogromina</i>           | <i>Allogromina</i> sp.       | -                                        | +  | -                      | -  | -                | -  |   |   |
|                     |                         | <i>Bathyallogromia</i>       | <i>Bathyallogromia</i> sp.   | +                                        | -  | -                      | +  | -                | +  |   |   |
|                     |                         | <i>Bowseria</i>              | <i>Bowseria</i> sp.          | +                                        | -  | -                      | +  | -                | +  |   |   |
|                     |                         | <i>Gloioagullmia</i>         | <i>Gloioagullmia</i> sp.     | +                                        | +  | +                      | +  | +                | +  |   |   |
|                     |                         | <i>Micrometula</i>           | <i>Micrometula</i> sp.       | +                                        | +  | +                      | +  | +                | +  |   |   |
|                     |                         | <i>Nemogullmia</i> incl.     | <i>Nemogullmia</i> sp.       | +                                        | +  | -                      | -  | -                | -  |   |   |
|                     |                         |                              | <i>N. longevariabilis</i>    | -                                        | +  | -                      | -  | -                | -  |   |   |
|                     |                         | <i>Phainogullmia</i>         | <i>Phainogullmia</i> sp.     | +                                        | +  | -                      | +  | -                | -  |   |   |
|                     |                         | <i>Shepherdella</i>          | <i>Shepherdella</i> sp.      | +                                        | +  | +                      | -  | -                | -  |   |   |
|                     |                         | <i>Tinogullmia</i> incl.     | <i>Tinogullmia</i> sp.       | +                                        | +  | +                      | +  | +                | +  |   |   |
|                     |                         |                              | <i>T. antarctica</i>         | +                                        | +  | -                      | -  | -                | -  |   |   |
|                     |                         | <i>Vellaria</i>              | <i>Vellaria</i> sp.          | +                                        | +  | -                      | -  | -                | -  |   |   |
|                     |                         | Astrorhizida                 | <i>Arnoldiellina</i>         | <i>A. fluorescens</i>                    | -  | +                      | -  | -                | -  | - |   |
|                     | <i>Astrammina</i>       |                              | <i>A. rara</i>               | -                                        | +  | -                      | -  | -                | -  |   |   |
|                     |                         |                              | <i>A. triangularis</i>       | -                                        | +  | -                      | -  | -                | -  |   |   |
|                     | <i>Bathysiphon</i>      |                              | <i>Bathysiphon</i> sp.       | -                                        | +  | -                      | +  | -                | -  |   |   |
|                     |                         |                              | <i>B. argenteus</i>          | -                                        | +  | -                      | -  | -                | +  |   |   |
|                     |                         |                              | <i>B. flexilis</i>           | -                                        | +  | -                      | -  | -                | +  |   |   |
|                     | <i>Conqueria</i>        |                              | <i>Conqueria</i> sp.         | -                                        | +  | -                      | +  | -                | -  |   |   |
|                     |                         |                              | <i>C. laevis</i>             | -                                        | +  | -                      | -  | -                | +  |   |   |
|                     | <i>Crithionina</i>      |                              | <i>Crithionina</i> sp.       | -                                        | +  | -                      | -  | -                | -  |   |   |
|                     |                         |                              | <i>C. granum</i>             | -                                        | +  | -                      | +  | -                | -  |   |   |
|                     | <i>Hemisphaerammina</i> |                              | <i>Hemisphaerammina</i> sp.  | -                                        | +  | -                      | -  | -                | -  |   |   |
|                     | <i>Hippocrepinella</i>  |                              | <i>Hippocrepinella</i> sp.   | +                                        | +  | +                      | +  | +                | +  |   |   |
|                     |                         |                              | <i>H. alba</i>               | +                                        | +  | +                      | +  | +                | +  |   |   |
|                     |                         |                              | <i>H. hirudinea</i>          | +                                        | +  | +                      | +  | +                | +  |   |   |
|                     | <i>Lagenammina</i>      |                              | <i>Lagenammina</i> sp.       | -                                        | +  | -                      | +  | -                | -  |   |   |
|                     |                         |                              | <i>L. arenulata</i>          | -                                        | +  | -                      | +  | -                | -  |   |   |
|                     | <i>Pelosina</i>         |                              | <i>P. fusiformis</i>         | -                                        | +  | -                      | +  | -                | -  |   |   |
|                     | <i>Pilulina</i>         |                              | <i>Pilulina</i> sp.          | -                                        | +  | -                      | +  | -                | -  |   |   |
|                     |                         |                              | <i>P. argentea</i>           | -                                        | +  | -                      | +  | -                | -  |   |   |
|                     | <i>Psammophaga</i>      |                              | <i>Psammophaga</i> sp.       | +                                        | +  | -                      | +  | -                | -  |   |   |
|                     |                         | <i>P. crystallifera</i>      | +                            | +                                        | -  | +                      | -  | -                |    |   |   |
|                     |                         | <i>P. fuegia</i>             | +                            | +                                        | -  | +                      | -  | -                |    |   |   |
|                     |                         | <i>P. magnetica</i>          | +                            | +                                        | -  | +                      | -  | -                |    |   |   |
|                     | <i>Psammospaera</i>     | <i>Psammospaera</i> sp.      | +                            | +                                        | -  | +                      | -  | -                |    |   |   |
|                     | <i>Rhabdammina</i>      | <i>Rhabdammina</i> sp.       | -                            | -                                        | +  | -                      | -  | -                |    |   |   |
|                     |                         | <i>R. discreta</i>           | -                            | -                                        | +  | -                      | -  | -                |    |   |   |
|                     | <i>Saccammina</i>       | <i>Saccammina</i> sp.        | +                            | +                                        | +  | +                      | +  | +                |    |   |   |
|                     | <i>Vanhoeffenella</i>   | <i>V. dilatata</i>           | -                            | -                                        | +  | -                      | -  | +                |    |   |   |
|                     | <i>Toxisarcon</i>       | <i>T. synsuecica</i>         | -                            | -                                        | +  | -                      | -  | -                |    |   |   |
|                     | Xenophyophorea          | <i>Moanammina</i>            | <i>M. semicircularis</i>     | +                                        | +  | -                      | +  | -                | -  |   |   |
|                     |                         | <i>Galatheammina</i>         | <i>Galatheammina</i> sp.     | +                                        | +  | -                      | -  | -                | -  |   |   |
| <i>Syringammina</i> |                         | <i>S. limosa</i>             | +                            | +                                        | +  | +                      | +  | +                |    |   |   |
| <i>Aschemonella</i> |                         | <i>A. monile</i>             | -                            | -                                        | -  | +                      | -  | -                |    |   |   |
|                     | <i>Nellya</i>           | <i>N. rugosa</i>             | +                            | -                                        | -  | -                      | -  |                  |    |   |   |
